# Supplementary material for: A Comparative Study of n- and p-Channel FeFETs with Ferroelectric HZO Gate Dielectric
Source: MDPI journal article supplement (doi:10.3390/solids4040023), 2023-12-01
Supplement: s1 [file s1]

Archive with 1 entries (1 files):
- solids-2666535-supplementary.pdf
