# Supplementary material for: A Comparative Study of n- and p-Channel FeFETs with Ferroelectric HZO Gate Dielectric
Source: MDPI journal article supplement (doi:10.3390/solids4040023), 2023-12-01
Supplement: s1 [file s1 › solids-2666535-supplementary.pdf]

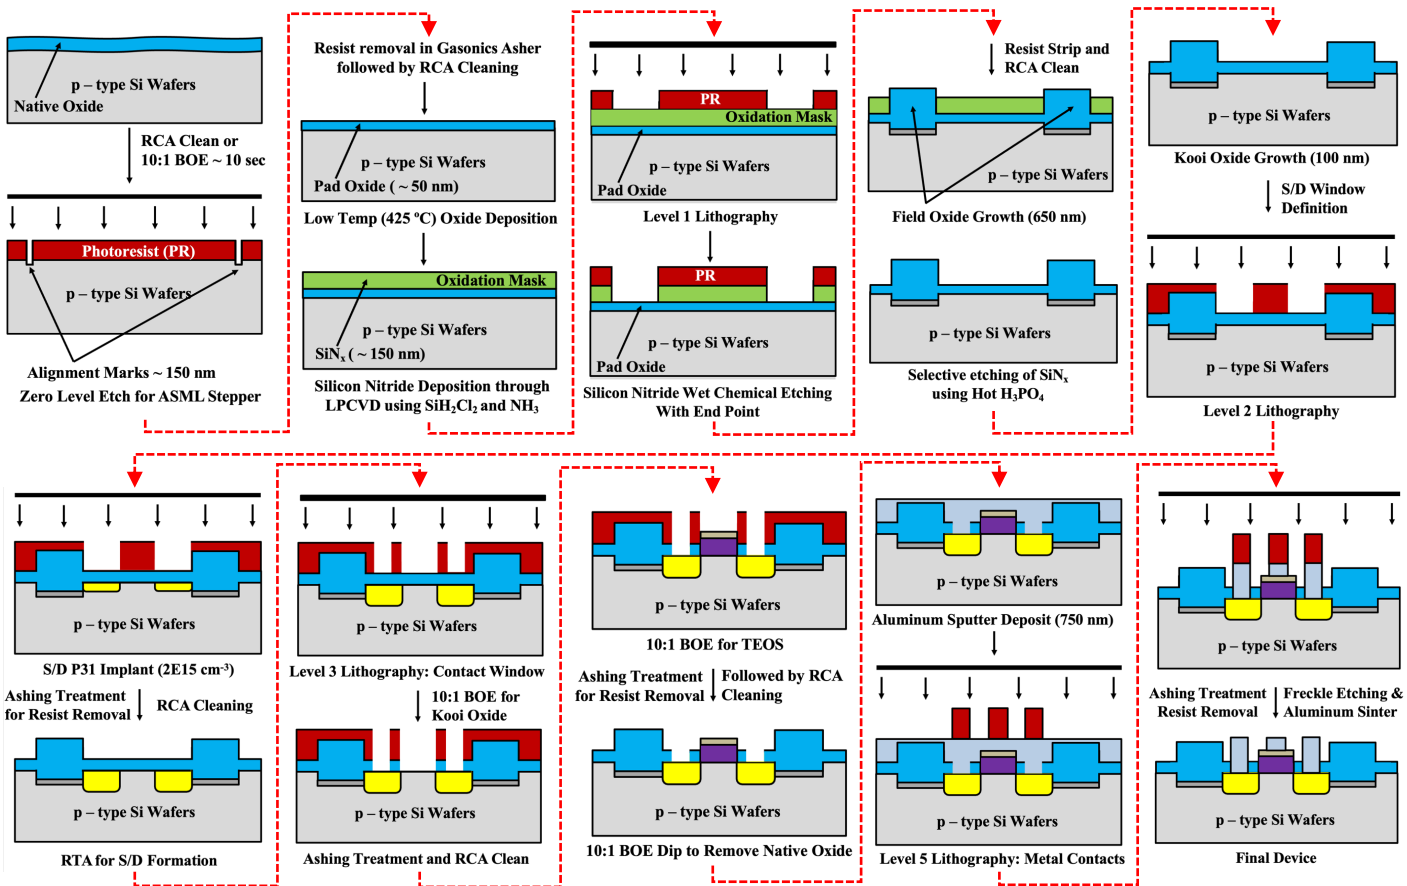

Figure S1. Process Flow for fabrication of n-FeFETs

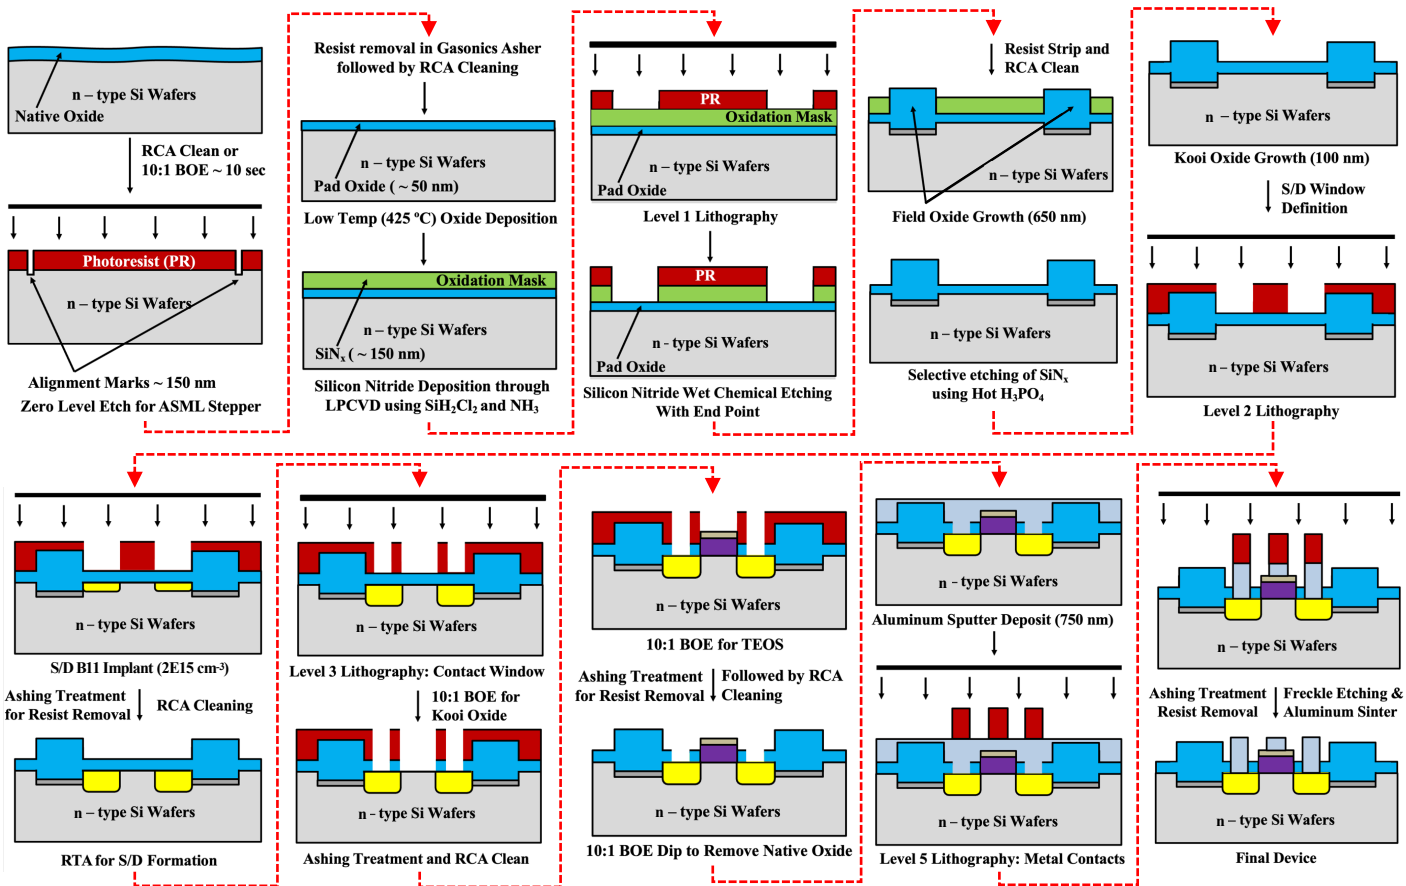

Figure S2. Process Flow for fabrication of p-FeFETs
